# Supplementary material
Source: Springer Nature journal article supplement (https://www.springermedizin.de/resource/supplementary/12873_2010_128_MOESM2_ESM.pdf/9431476)
Supplement: MOESM2 [file 9431476]

Step 1 – Sort:  
Global Sorting

Walk  
Assess 3rd

Wave / Purposeful Movement  
Assess 2nd

Still / Obvious Life Threat  
Assess 1st

Step 2 – Assess:  
Individual Assessment

**LSI:**

- Control major hemorrhage
- Open airway (if child consider 2 rescue breaths)
- Chest decompression
- Auto injector antidotes

Breathing

No  
**Dead**

Yes

- Obeys commands or makes purposeful movements?
- Has Peripheral Pulse?
- Not in respiratory distress?
- Major hemorrhage is controlled?

Any No

Likely to survive given  
current resources

No  
**Expectant**

Minor  
Injuries  
only?

No  
**Delayed**

All  
Yes

Yes

**Minimal**

Yes  
**Immediate**
